# Supplementary material for: Development of curcumin-loaded zein nanoparticles for transport across the blood–brain barrier and inhibition of glioblastoma cell growth
Source: Royal Society of Chemistry journal article supplement (doi:10.1039/d0bm01536a), 2021-01-01
Supplement: d0bm01536a1.pdf [file d0bm01536a1.pdf]

## Supplementary Figures

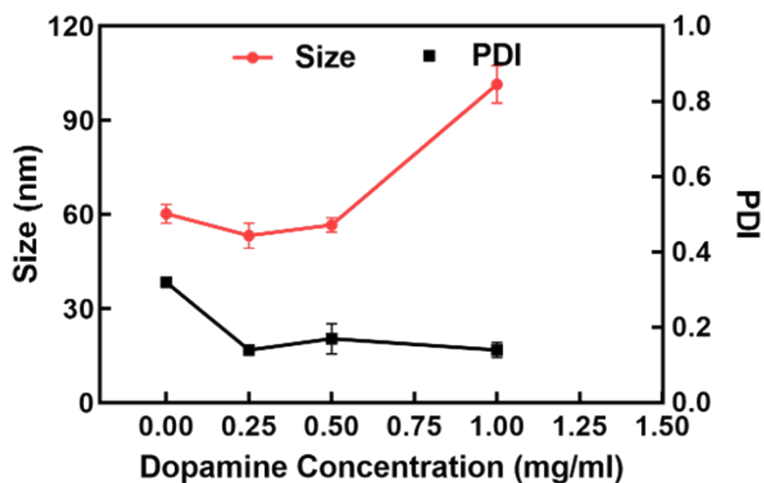

Figure S1. DLS size and polydispersity index (PDI) of Zein NPs with increasing dopamine concentration, Zein=10 mg/ml.

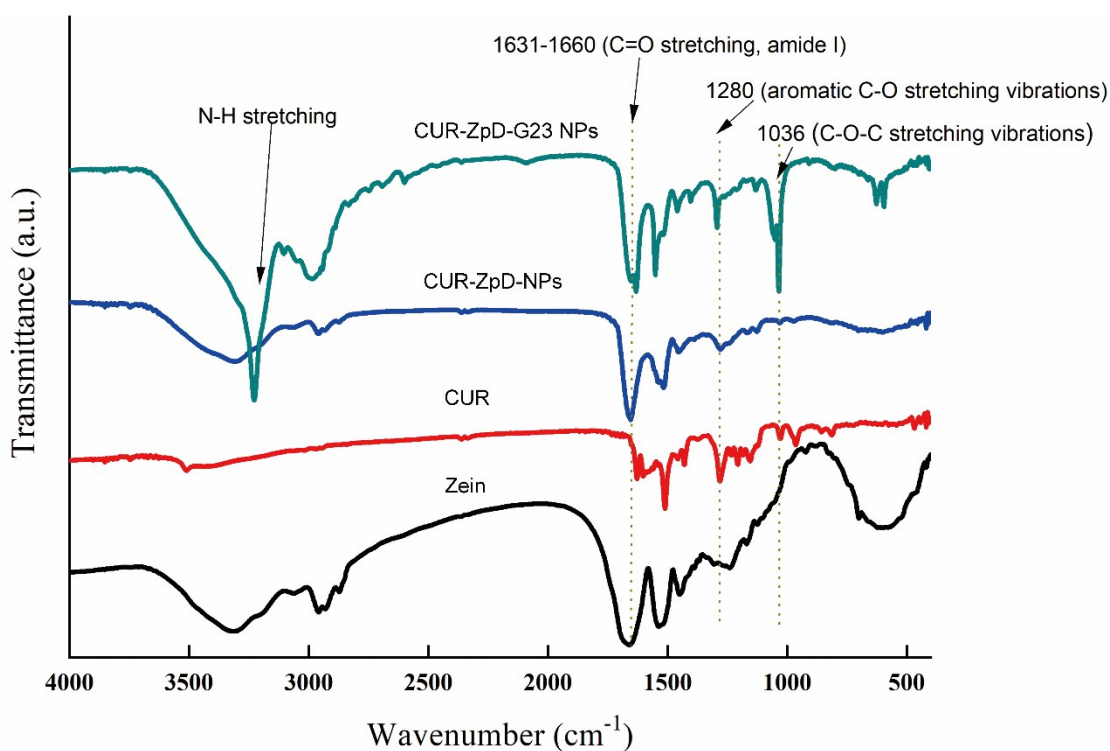

Figure S2. FTIR spectra of zein, CUR, CUR-ZpD NPs and CUR-ZpD-G23 NPs.

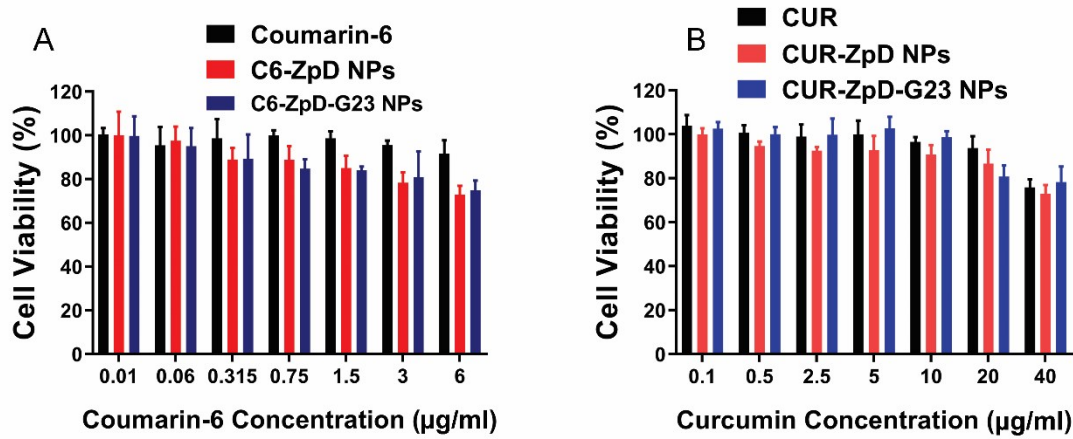

Figure S3. Relative viability of human cerebral microvascular endothelial (hCMEC/D3) cells in presence of C6- and curcumin-loaded ZpD NPs. (A) Viability of cells incubated with increasing concentration of coumarin-6 or coumarin-6 loaded nanoparticles. (B) Viability of cells incubated with increasing concentration of curcumin or curcumin loaded nanoparticles. The weight concentration of coumarin-6 loaded NPs equals that of CUR-loaded NPs (curcumin=40 µg/ml). The cell viability was assessed by MTT assay after incubation for 24 h. (n=3)

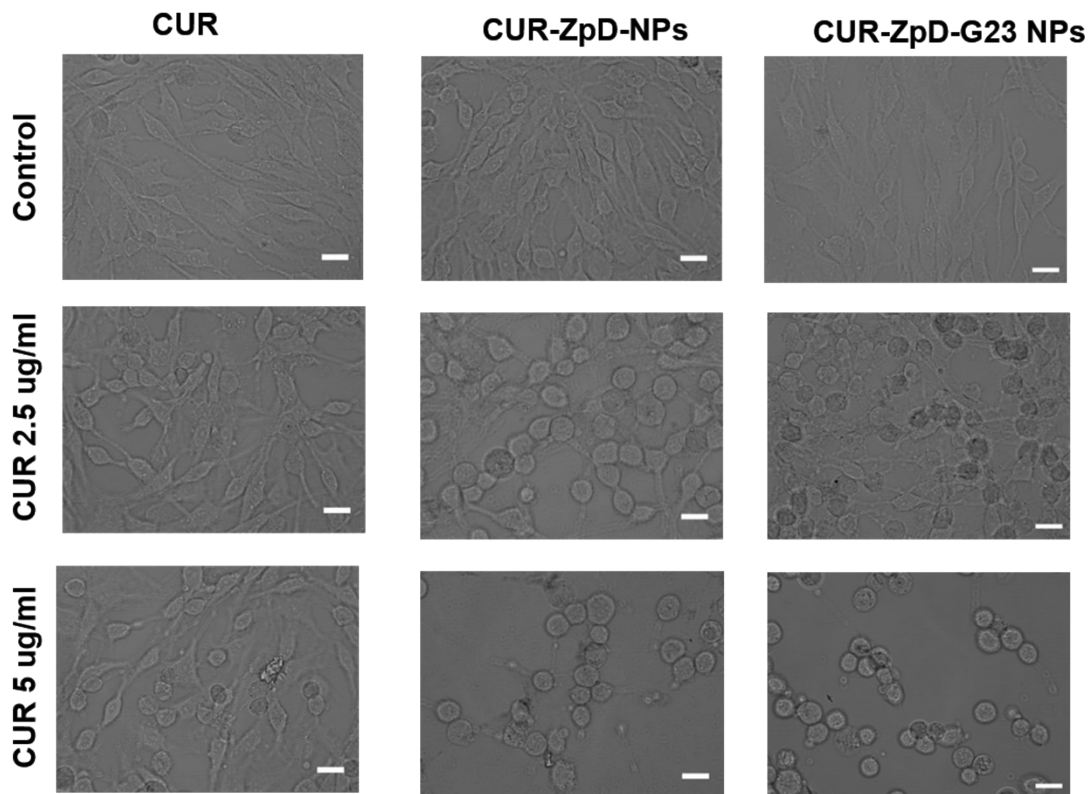

Figure S4. Morphology of C6 glioma cells after treatment with CUR, CUR-ZpD-NPs and CUR-ZpD-G23 NPs for 24 h. Scale bars represent 20 µm.

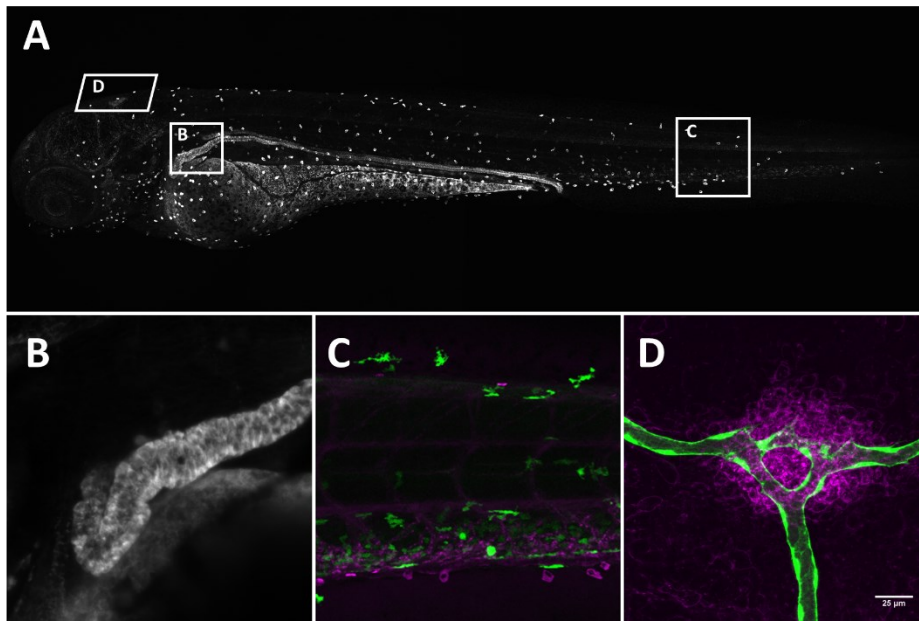

Figure S5. Off-targeting of Cy3-NH<sub>2</sub> in 3.5 dpf zebrafish larva, 2hpi. (a) Cy3-NH<sub>2</sub> distribution in whole larva, (b) Cy3-NH<sub>2</sub> fluorescence in kidneys, (c) Cy3-NH<sub>2</sub> (magenta) uptake by ionocytes, in mpeg:GFP (green) larva, (d) dorsal view extravasation of Cy3-NH<sub>2</sub> (magenta) from vasculature (green) to Choroid Plexus, in kdlr:GFP larva.

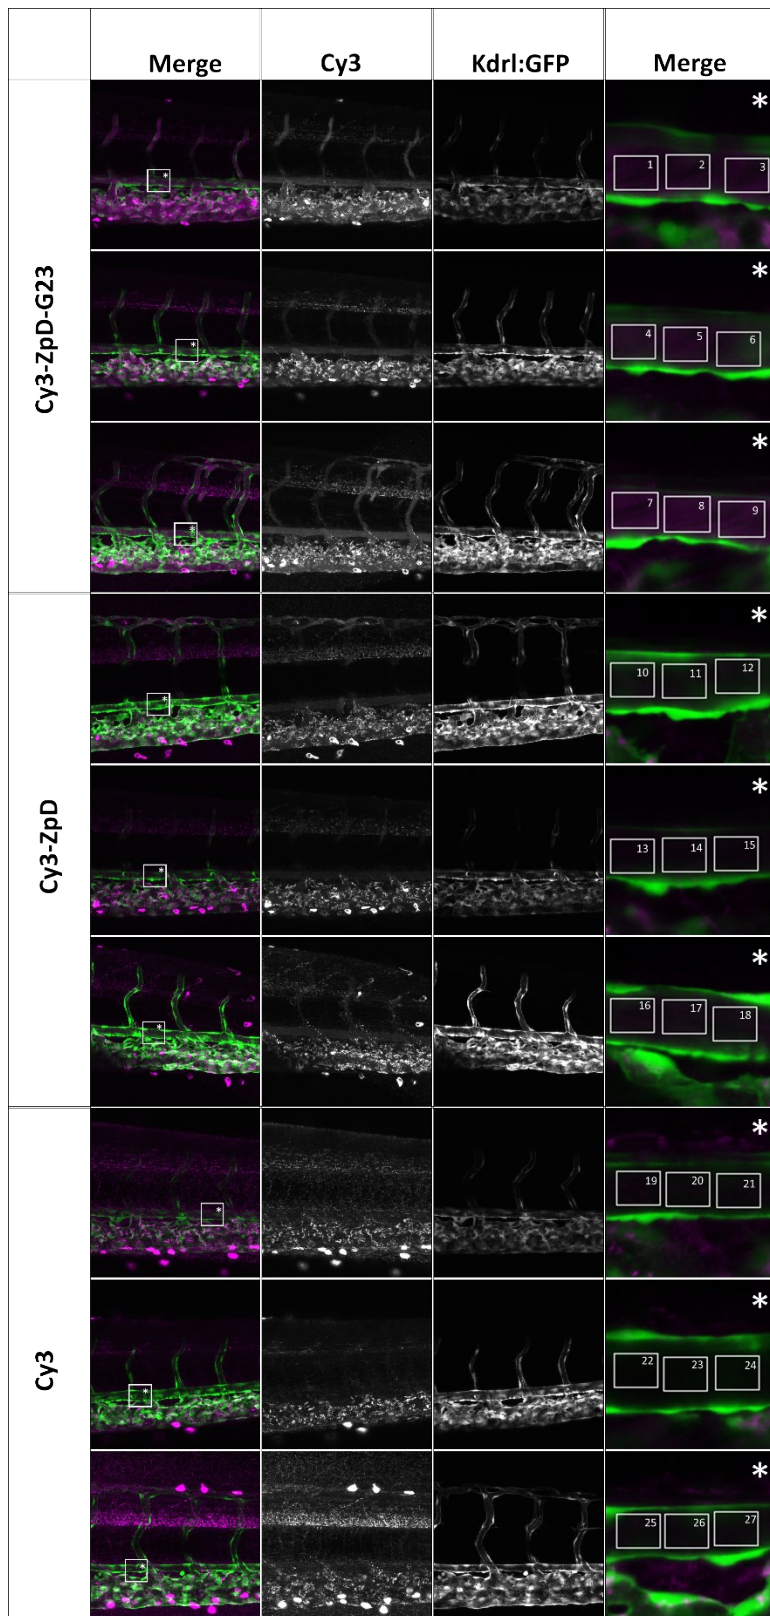

Figure S6. Confocal microscopy stacks of *kdr1:GFP* (green) larvae injected with Cy3-ZpD-G23, Cy3-ZpD or Cy3-NH<sub>2</sub> (magenta). Boxes with numbers represent ROIs of measured fluorescence intensity of Cy3 for sum of 4 slices of dorsal aorta shown in Table S1.

|                 |        |      | Box | Nr     | mean    | min     | max     |
|-----------------|--------|------|-----|--------|---------|---------|---------|
| Cy3-Zein-PD-G23 | Fish 1 | ROI1 | 1   | 81.194 | 167.097 | 91.000  | 260.000 |
|                 |        | ROI2 | 2   | 81.194 | 183.205 | 129.000 | 253.000 |
|                 |        | ROI3 | 3   | 81.194 | 181.169 | 119.000 | 247.000 |
|                 | Fish 2 | ROI1 | 4   | 81.194 | 126.006 | 74.000  | 209.000 |
|                 |        | ROI2 | 5   | 81.194 | 124.010 | 64.000  | 225.000 |
|                 |        | ROI3 | 6   | 81.194 | 132.817 | 60.000  | 236.000 |
|                 | Fish 3 | ROI1 | 7   | 81.194 | 134.569 | 95.000  | 184.000 |
|                 |        | ROI2 | 8   | 81.194 | 132.659 | 79.000  | 193.000 |
|                 |        | ROI3 | 9   | 81.194 | 117.867 | 65.000  | 172.000 |
| Cy3-Zein-PD     | Fish 1 | ROI1 | 10  | 81.194 | 91.437  | 55.000  | 151.000 |
|                 |        | ROI2 | 11  | 81.194 | 94.512  | 53.000  | 139.000 |
|                 |        | ROI3 | 12  | 81.194 | 87.717  | 47.000  | 135.000 |
|                 | Fish 2 | ROI1 | 13  | 81.194 | 74.502  | 43.201  | 113.042 |
|                 |        | ROI2 | 14  | 81.194 | 64.652  | 41.997  | 94.904  |
|                 |        | ROI3 | 15  | 81.194 | 70.812  | 45.897  | 99.127  |
|                 | Fish 3 | ROI1 | 16  | 81.194 | 60.094  | 34.000  | 109.000 |
|                 |        | ROI2 | 17  | 81.194 | 60.980  | 32.000  | 109.000 |
|                 |        | ROI3 | 18  | 81.194 | 59.348  | 31.000  | 89.000  |
| Cy3             | Fish 1 | ROI1 | 19  | 81.194 | 62.726  | 35.000  | 114.000 |
|                 |        | ROI2 | 20  | 81.194 | 57.201  | 34.000  | 128.000 |
|                 |        | ROI3 | 21  | 81.194 | 56.187  | 32.000  | 101.000 |
|                 | Fish 2 | ROI1 | 22  | 81.194 | 28.786  | 16.000  | 49.000  |
|                 |        | ROI2 | 23  | 81.194 | 29.873  | 18.000  | 49.000  |
|                 |        | ROI3 | 24  | 81.194 | 32.153  | 19.000  | 49.000  |
|                 | Fish 3 | ROI1 | 25  | 81.194 | 64.654  | 39.000  | 113.000 |
|                 |        | ROI2 | 26  | 81.194 | 63.757  | 36.000  | 112.000 |
|                 |        | ROI3 | 27  | 81.194 | 64.276  | 38.000  | 114.000 |

Table S1. Measured fluorescence intensity of Cy3 for sum of 4 slices of dorsal aorta. Box Nr correlates with numbers in Figure S5.
